# Supplementary material for: Honeybee Colonies (Apis mellifera L.) Perform Orientation Aggressiveness Which Varies Among Bred Lines
Source: Preprints.org preprint supplement (doi:10.20944/preprints202305.0758.v1), 2023-05-10
Supplement: Supplementary file 1 [file supplementary]

Honeybee colonies (*Apis mellifera* L) perform orientation aggressiveness which varies among bred lines

### Supplementary materials

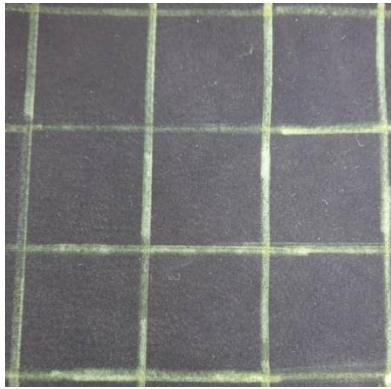

(a)

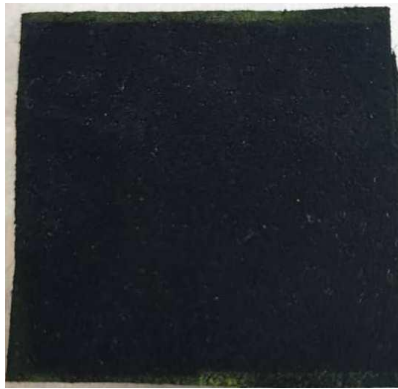

(b)

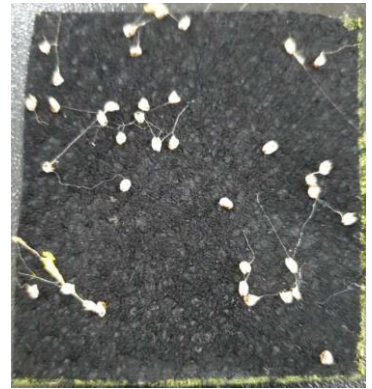

(c)

**Figure S1:** Dark leather suede used for evaluating aggressiveness in honey bees. Marked suede in squares of 5 by 5 cm (a), square suede treated with chemical assays (b), square suede containing honey bee stings (c).

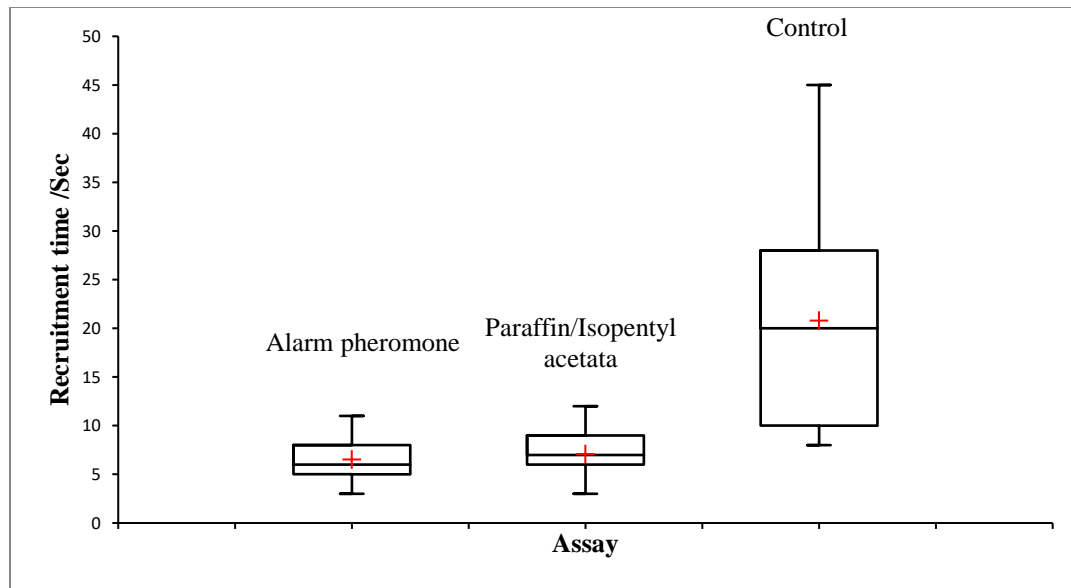

**Figure S2:** Box plot for the time of recruitment of honey bee per assay

The time at which honey bees responded to the alarm pheromone assay was lesser compared to paraffin mixed with isopentyl acetate while honey bees took more time to respond to the empty suede.

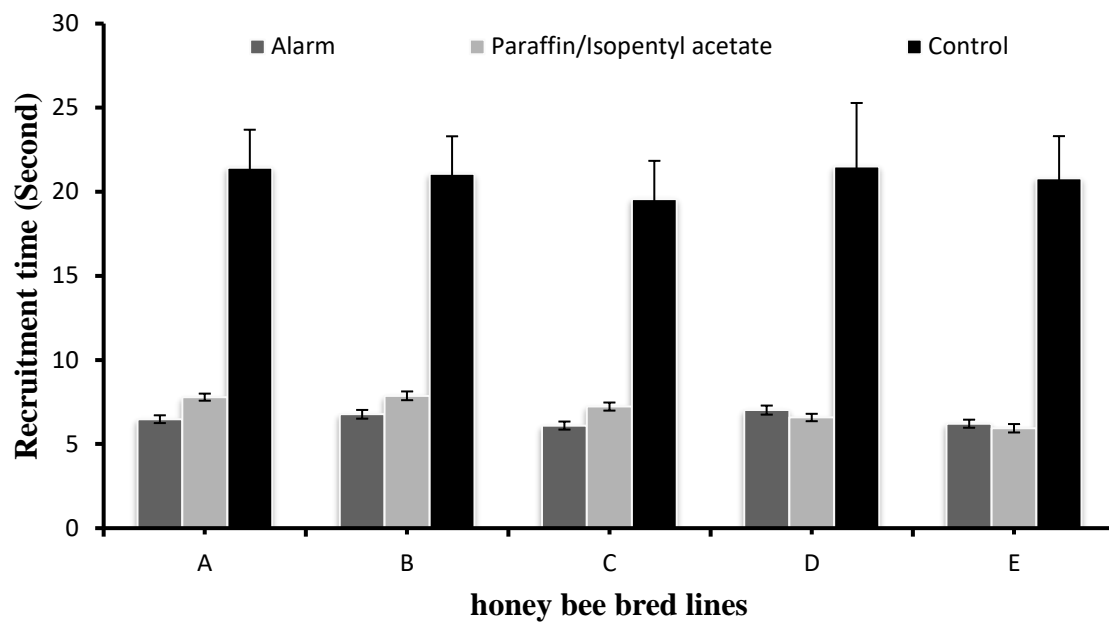

**Figure S3:** Variation in the recruitment time among bred lines of honey bee colonies.

**Table S1:** Mean number of stings of honey bee in response to assays at different time of sampling

| Time  | Assays            |                            |                  |
|-------|-------------------|----------------------------|------------------|
|       | Alarm pheromone   | Paraffin/isopentyl acetate | Control          |
|       | Mean $\pm$ SE     | Mean $\pm$ SE              | Mean $\pm$ SE    |
| 10Sec | 0.33 $\pm$ 0.14a  | 0.25 $\pm$ 0.08a           | 0.07 $\pm$ 0.04a |
| 30Sec | 2.32 $\pm$ 0.82a  | 1.65 $\pm$ 0.43a           | 0.03 $\pm$ 0.02b |
| 60Sec | 3.2 $\pm$ 0.89a   | 2.85 $\pm$ 0.66a           | 0.32 $\pm$ 0.17b |
| 90Sec | 10.67 $\pm$ 2.35a | 6.85 $\pm$ 1.57a           | 0.42 $\pm$ 0.17b |

\*Means in a row with same letter are not significantly different. One-way ANOVA,  $P < 0.05$

**Table S2:** Variation in the mean number of stings among bred lines when colonies were marbled and when not marbled.

| Bred lines | Marbled                         |                          | U - value | P-value (Alarm vs Paraffin) | Non-marbled                     |                          | U - value | P-value (Alarm vs Paraffin) |
|------------|---------------------------------|--------------------------|-----------|-----------------------------|---------------------------------|--------------------------|-----------|-----------------------------|
|            | Alarm pheromone (Mean $\pm$ SE) | Paraffin (Mean $\pm$ SE) |           |                             | Alarm pheromone (Mean $\pm$ SE) | Paraffin (Mean $\pm$ SE) |           |                             |
| A          | 10.81 $\pm$ 1.69a               | 9.31 $\pm$ 1.76ab        | 1258      | 0.438                       | 2.1 $\pm$ 0.44a                 | 1.23 $\pm$ 0.36a         | 1387      | 0.063                       |
| B          | 10.9 $\pm$ 1.83a                | 8.37 $\pm$ 1.63a         | 1275      | 0.363                       | 2.02 $\pm$ 0.44a                | 0.83 $\pm$ 0.21a         | 1456      | 0.016                       |
| C          | 27.06 $\pm$ 3.71b               | 15.5 $\pm$ 2.36ab        | 1467      | 0.021                       | 4.42 $\pm$ 0.75ab               | 1.56 $\pm$ 0.41a         | 1611.5    | 0.0004                      |
| D          | 24.52 $\pm$ 3.26ab              | 19.6 $\pm$ 3.02b         | 1280      | 0.348                       | 4.42 $\pm$ 0.95ab               | 1.56 $\pm$ 0.33a         | 1443.5    | 0.027                       |
| E          | 28.92 $\pm$ 3.71b               | 17 $\pm$ 2.4b            | 1432      | 0.04                        | 6.48 $\pm$ 1.24b                | 4.23 $\pm$ 1.15a         | 1454      | 0.024                       |

\*Means with different small letter in a column are significantly different at  $P < 0.05$ , Kruskal-Wallis test.
